# Supplementary material
Source: publisher figshare collection journal article supplement (https://karger.figshare.com/articles/dataset/_/7218101)
Supplement: Supplementary file 2 [file 2]

## a

b[illegible]
