# Supplementary material
Source: publisher figshare collection journal article supplement (https://karger.figshare.com/articles/dataset/_/7218101)
Supplement: Supplementary file 3 [file 2]

| Patient number | No.     | Age | TNM   | Stage | Component | Nuclear atypia | ER(%) | PgR(%) | HER2 | MIB-I(%) | Subtype                       |
|----------------|---------|-----|-------|-------|-----------|----------------|-------|--------|------|----------|-------------------------------|
| #1             | C1i     | 49  | 1/0/0 | I     | Invasive  | 2              | 0     | 0      | 3    | 29       | HER2 positive(non-luminal)    |
| #1             | C1d     |     |       |       | Ductal    | 3              | 0     | 0      | 3    | 15       | HER2 positive(non-luminal)    |
| #2             | C2i     | 53  | 2/0/0 | IIA   | Invasive  | 2              | 30    | 0      | 0    | 37       | Luminal B-like(HER2 negative) |
| #2             | C2d     |     |       |       | Ductal    | 2              | 12    | 0      | 0    | 30       | Luminal B-like(HER2 negative) |
| #3             | C3i     | 62  | 1/0/0 | I     | Invasive  | 2              | 100   | 0      | 1    | 6        | Luminal B-like(HER2 negative) |
| #3             | C3d     |     |       |       | Ductal    | 2              | 100   | 0      | 0    | 6        | Luminal B-like(HER2 negative) |
| #4             | C4i     | 62  | 2/0/0 | IIA   | Invasive  | 2              | 80    | 0      | 1    | 2        | Luminal B-like(HER2 negative) |
| #4             | C4d-m   |     |       |       | Ductal    | 2              | 90    | 0      | 1    | 5        | Luminal B-like(HER2 negative) |
| #4             | C4d-s   |     |       |       | Ductal    | 2              | 90    | 0      | 1    | 5        | Luminal B-like(HER2 negative) |
| #5             | C5i     | 62  | 1/1/0 | IIA   | Invasive  | 1              | 100   | 1      | 1    | 7        | Luminal B-like(HER2 negative) |
| #5             | C5d     |     |       |       | Ductal    | 1              | 100   | 70     | 0    | 3        | Luminal A-like                |
| #6             | C6i     | 83  | 1/0/0 | I     | Invasive  | 2              | 100   | 0      | 3    | 13       | Luminal B-like(HER2 positive) |
| #6             | C6d     |     |       |       | Ductal    | 1              | 100   | 1      | 2    | 6        | Luminal B-like(HER2 negative) |
| #7             | C7i     | 37  | 1/1/0 | IIA   | Invasive  | 2              | 99    | 90     | 0    | 17       | Luminal B-like(HER2 negative) |
| #7             | C7d     |     |       |       | Ductal    | 2              | 100   | 60     | 1    | 5        | Luminal A-like                |
| #7             | C7L     |     |       |       | LN's meta | 2              | 100   | 40     | 0    | 27       | Luminal B-like(HER2 negative) |
| #8             | C8i     | 43  | 2/0/0 | IIA   | Invasive  | 1              | 90    | 90     | 1    | 13       | Luminal A-like                |
| #8             | C8d     |     |       |       | Ductal    | 1              | 99    | 100    | 1    | 7        | Luminal A-like                |
| #9             | C9i     | 35  | 1/0/0 | I     | Invasive  | 2              | 98    | 0      | 0    | 25       | Luminal B-like(HER2 negative) |
| #9             | C9d     |     |       |       | Ductal    | 1              | 100   | 0      | 0    | 8        | Luminal B-like(HER2 negative) |
| #10            | C10i    | 46  | 1/0/0 | I     | Invasive  | 1              | 98    | 90     | 1    | 33       | Luminal B-like(HER2 negative) |
| #11            | C11i    | 73  | 1/0/0 | I     | Invasive  | 2              | 100   | 50     | 0    | 15       | Luminal B-like(HER2 negative) |
| #12            | C12i    | 50  | 1/0/0 | I     | Invasive  | 1              | 98    | 40     | 1    | 9        | Luminal A-like                |
| #12            | C12d    |     |       |       | Ductal    | 1              | 98    | 10     | 0    | 4        | Luminal B-like(HER2 negative) |
| #13            | C13i-w1 | 57  | 1/1/0 | IIA   | Invasive  | 1              | 100   | 70     | 0    | 16       | Luminal B-like(HER2 negative) |
| #13            | C13L-w1 |     |       |       | LN's meta | 2              | 100   | 90     | 0    | 15       | Luminal B-like(HER2 negative) |
| #14            | C14i    | 47  | 2/1/0 | IIB   | Invasive  | 2              | 70    | 0      | 0    | 10       | Luminal B-like(HER2 negative) |
| #14            | C14d    |     |       |       | Ductal    | 2              | 80    | 0      | 0    | 5        | Luminal B-like(HER2 negative) |
| #14            | C14L    |     |       |       | LN's meta | 2              | 90    | 10     | 0    | 10       | Luminal B-like(HER2 negative) |
| #15            | C15i    | 45  | 1/0/0 | I     | Invasive  | 1              | 70    | 10     | 1    | 10       | Luminal B-like(HER2 negative) |
| #15            | C15d    |     |       |       | Ductal    | 1              | 80    | 20     | 1    | 10       | Luminal A-like                |
| #16            | C16i    | 52  | 1/0/0 | I     | Invasive  | 2              | 50    | 90     | 1    | 18       | Luminal B-like(HER2 negative) |
| #16            | C16d    |     |       |       | Ductal    | 2              | 50    | 80     | 1    | 20       | Luminal B-like(HER2 negative) |
| #17            | C17i-w2 | 84  | 1/0/0 | I     | Invasive  | 2              | 100   | 0      | 0    | 5        | Luminal B-like(HER2 negative) |
| #17            | C17d-w2 |     |       |       | Ductal    | 2              | 100   | 30     | 0    | 3        | Luminal A-like                |
| #18            | C18i    | 81  | 2/1/1 | IV    | Invasive  | 3              | 0     | 0      | 1    | 20       | Triple negative               |
| #18            | C18d    |     |       |       | Ductal    | 3              | 0     | 0      | 1    | 20       | Triple negative               |
| #18            | C18L    |     |       |       | LN's meta | 3              | 0     | 0      | 1    | 18       | Triple negative               |
| #19            | C19i    | 51  | 2/1/0 | IIB   | Invasive  | 3              | 70    | 5      | 3    | 15       | Luminal B-like(HER2 positive) |
| #19            | C19d    |     |       |       | Ductal    | 3              | 70    | 5      | 3    | 14       | Luminal B-like(HER2 positive) |
| #20            | C20i    | 42  | 1/0/0 | I     | Invasive  | 2              | 90    | 5      | 0    | 10       | Luminal B-like(HER2 negative) |
| #20            | C20d    |     |       |       | Ductal    | 2              | 90    | 5      | 0    | 5        | Luminal B-like(HER2 negative) |
| #21            | C21i    | 63  | 2/0/0 | IIA   | Invasive  | 2              | 100   | 0      | 0    | 15       | Luminal B-like(HER2 negative) |
| #21            | C21d    |     |       |       | Ductal    | 2              | 90    | 0      | 0    | 10       | Luminal B-like(HER2 negative) |
| #22            | C22i    | 78  | 1/0/0 | I     | Invasive  | 2              | 100   | 5      | 1    | 20       | Luminal B-like(HER2 negative) |
| #23            | C23i    | 55  | 1/0/0 | I     | Invasive  | 3              | 100   | 0      | 0    | 25       | Luminal B-like(HER2 negative) |
| #24            | C24d    | 33  | 1/0/0 | I     | Ductal    | 2              | 100   | 60     | 0    | 5        | Luminal A-like                |
| #25            | C25L    | 58  | 1/1/0 | IIA   | LN's meta | 2              | 50    | 0      | 0    | 20       | Luminal B-like(HER2 negative) |
| #26            | C26i    | 58  | 1/1/0 | IIA   | Invasive  | 3              | 0     | 0      | 1    | 15       | Triple negative               |
| #26            | C26L    |     |       |       | LN's meta | 3              | 0     | 0      | 0    | 15       | Triple negative               |
| #27            | C27i    | 64  | 2/0/0 | IIA   | Invasive  | 3              | 0     | 0      | 0    | 10       | Triple negative               |
| #28            | C28i    | 35  | 2/0/0 | IIA   | Invasive  | 2              | 0     | 0      | 0    | 1        | Triple negative               |
| #28            | C28d    |     |       |       | Ductal    | 2              | 0     | 0      | 0    | 1        | Triple negative               |
| #29            | C29i    | 61  | 1/1/0 | IIA   | Invasive  | 2              | 0     | 0      | 0    | 3        | Triple negative               |
| #29            | C29L    |     |       |       | LN's meta | 2              | 0     | 0      | 0    | 30       | Triple negative               |
| #30            | C30i    | 59  | 1/0/0 | I     | Invasive  | 3              | 0     | 0      | 0    | 18       | Triple negative               |
| #30            | C30d    |     |       |       | Ductal    | 3              | 0     | 0      | 0    | 13       | Triple negative               |
| #31            | D1      | 79  |       | 0     | DCIS      | 1              | 100   | 15     | 0    | 1        | Luminal B-like(HER2 negative) |
| #32            | D2      | 51  |       | 0     | DCIS      | 2              | 100   | 10     | 0    | 2        | Luminal B-like(HER2 negative) |
| #33            | D3      | 40  |       | 0     | DCIS      | 2              | 60    | 60     | 1    | 4        | Luminal A-like                |
| #34            | D4      | 52  |       | 0     | DCIS      | 2              | 0     | 0      | 3    | 10       | HER2 positive(non-luminal)    |
| #35            | D5      | 46  |       | 0     | DCIS      | 2              | 90    | 90     | 0    | 13       | Luminal A-like                |
| #36            | D6-m    | 49  |       | 0     | DCIS      | 1              | 95    | 70     | 2    | 12       | Luminal A-like                |
| #36            | D6-s    |     |       |       | DCIS      | 1              | 99    | 30     | 2    | 10       | Luminal A-like                |
| #37            | D7      | 53  |       | 0     | DCIS      | 3              | 40    | 10     | 0    | 20       | Luminal B-like(HER2 negative) |
| #38            | D8      | 52  |       | 0     | DCIS      | 2              | 90    | 95     | 2    | 7        | Luminal A-like                |
| #13            | D9-w1   | 57  |       | 0     | DCIS      | 1              | 100   | 50     | 1    | 7        | Luminal A-like                |
| #39            | D10     | 64  |       | 0     | DCIS      | 2              | 80    | 20     | 0    | 2        | Luminal A-like                |
| #40            | D11     | 51  |       | 0     | DCIS      | 1              | 90    | 60     | 1    | 1        | Luminal A-like                |
| #41            | D12     | 44  |       | 0     | DCIS      | 1              | 99    | 95     | 1    | 10       | Luminal A-like                |
| #41            | P12     |     |       | 0     | DCIS      | 1              | 80    | 80     | 0    | 3        | Luminal A-like                |
| #42            | D13     | 63  |       | 0     | DCIS      | 2              | 0     | 0      | 3    | 25       | HER2 positive(non-luminal)    |
| #43            | D14     | 57  |       | 0     | DCIS      | 3              | 0     | 0      | 3    | 10       | HER2 positive(non-luminal)    |
| #17            | D15-w2  | 84  |       | 0     | DCIS      | 2              | 0     | 0      | 3    | 10       | HER2 positive(non-luminal)    |
| #44            | D16     | 68  |       | 0     | DCIS      | 1              | 100   | 0      | 0    | 3        | Luminal B-like(HER2 negative) |
| #45            | D17     | 61  |       | 0     | DCIS      | 2              | 100   | 0      | 3    | 10       | Luminal B-like(HER2 positive) |
| #46            | D18     | 52  |       | 0     | DCIS      | 1              | 5     | 0      | 3    | 3        | Luminal B-like(HER2 positive) |
| #47            | D19     | 35  |       | 0     | DCIS      | 1              | 100   | 0      | 1    | 5        | Luminal B-like(HER2 negative) |
| #48            | D20     | 56  |       | 0     | DCIS      | 2              | 5     | 0      | 3    | 10       | Luminal B-like(HER2 positive) |
| #49            | D21     | 59  |       | 0     | DCIS      | 2              | 100   | 30     | 0    | 5        | Luminal A-like                |
| #50            | D22     | 49  |       | 0     | DCIS      | 2              | 100   | 80     | 0    | 5        | Luminal A-like                |
