# Supplementary material
Source: publisher figshare collection journal article supplement (https://karger.figshare.com/articles/dataset/_/7218101)

## Supplementary file 2

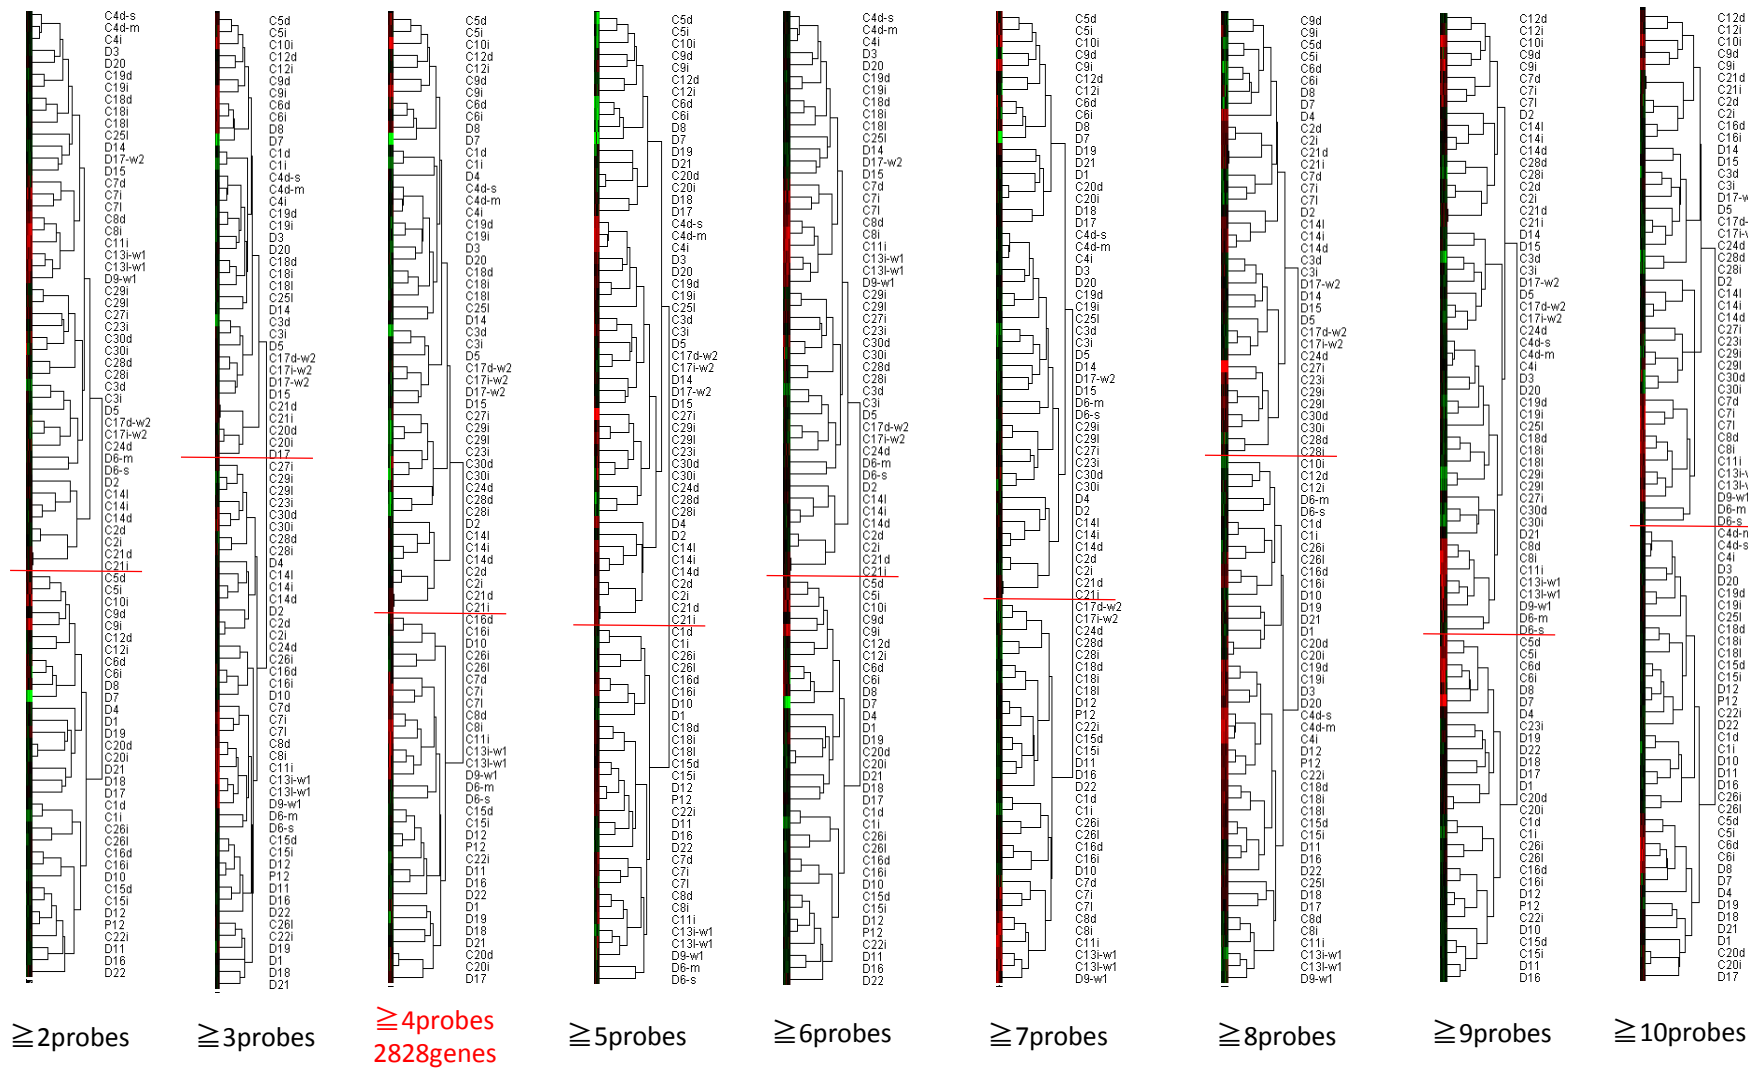

Supplement: Supplementary file 1 [file 2]
